# Supplementary material
Source: PubMed Central journal article supplement (PMC4408779)
Supplement: NIHMS633193-supplement-supplement_1.pdf [file NIHMS633193-supplement-supplement_1.pdf]

**Supplemental Table 1: Brachial artery parameters during placebo and salsalate after Vitamin C infusion**

| Variable                      | Young<br>Non-exercising |             | Older<br>Non-exercising |               | Older<br>Exercise-Trained |             |
|-------------------------------|-------------------------|-------------|-------------------------|---------------|---------------------------|-------------|
|                               | Placebo                 | Salsalate   | Placebo                 | Salsalate     | Placebo                   | Salsalate   |
| Brachial artery diameter (mm) | 4.0 ± 0.1               | 4.1 ± 0.1   | 3.7 ± 0.2               | 3.7 ± 0.2     | 3.7 ± 0.2                 | 3.8 ± 0.2   |
| FMD (mm change)               | 0.29 ± 0.03             | 0.31 ± 0.03 | 0.20 ± 0.03 *           | 0.26 ± 0.03 † | 0.27 ± 0.02               | 0.29 ± 0.02 |
| Peak shear rate (1/s)         | 858 ± 66                | 818 ± 62    | 851 ± 91                | 921 ± 68      | 913 ± 63                  | 875 ± 63    |

Data are mean ± SE. FMD, flow-mediated dilation; GTN, glyceryl trinitrate. \* P<0.05 vs. young non-exercising placebo, † P<0.05 vs. older non-exercising placebo

**Summary statement.** Our results suggest that inflammatory regulator nuclear factor- $\kappa$ B is associated with impaired arterial function in healthy non-exercising, but not exercising older adults. This may be a mechanism by which regular aerobic exercise preserves function and reduces cardiovascular risk with aging.
